# Supplementary material
Source: PubMed Central journal article supplement (PMC4686145)
Supplement: NIHMS743059-supplement-SI1.pdf [file NIHMS743059-supplement-SI1.pdf]

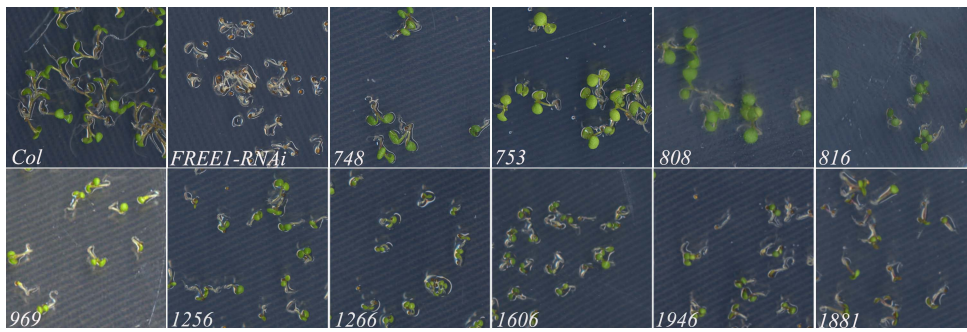

Fig. S1. Representative putative FREE1-related *sof* mutants with altered seedling phenotype.

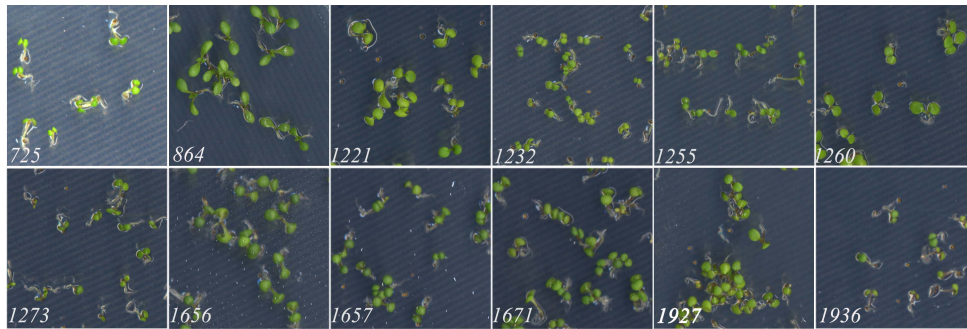

Fig. S2. Representative putative RNAi-related *sof* mutants with altered seedling phenotype.



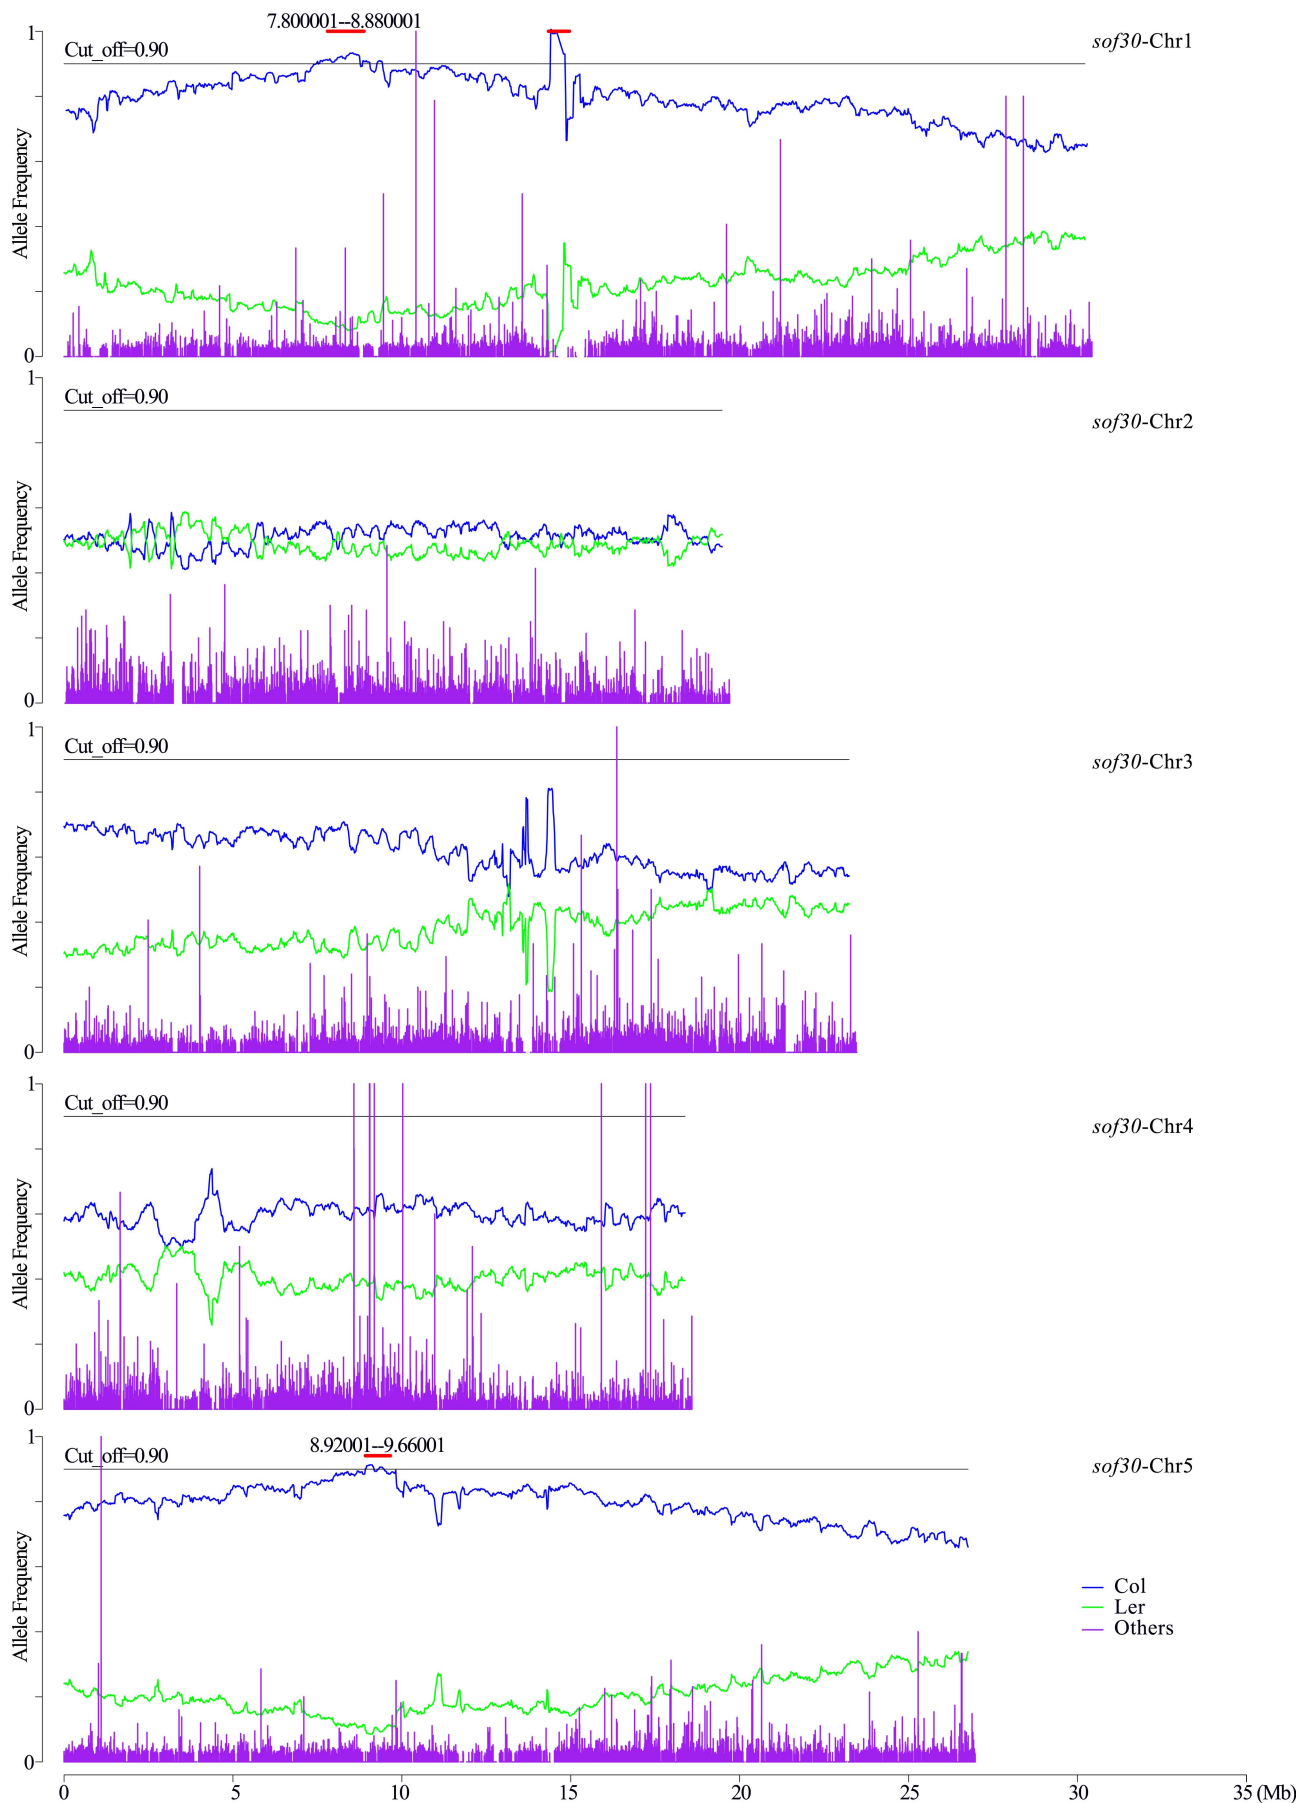

Fig. S4. Allele frequency analysis result of *sof30* chromosomal 1-5. For *sof30*, one peak located on chr1, and shared by *sof18*. The second peak located on chr5, and is specific to *sof30*.
