# Supplementary material
Source: PubMed Central journal article supplement (PMC4686145)
Supplement: NIHMS743059-supplement-SI2.pdf [file NIHMS743059-supplement-SI2.pdf]

Table S1. Summary of FREE1-related *sof* mutants.

|    | Mutant ID      | SubFamily No. | DEX <sup>R</sup> | Hyg <sup>R</sup> | Western Blot | FM Dye staining | NGS | Special Phenotype        |
|----|----------------|---------------|------------------|------------------|--------------|-----------------|-----|--------------------------|
| 1  | <i>sof452</i>  | 1-8           | Y                | Y                | Y            | Y               | Y   |                          |
| 2  | <i>sof453</i>  | 1-8           | Y                | Y                | Y            | Y               | Y   |                          |
| 3  | <i>sof524</i>  | 2-8           | Y                | Y                | Y            | Y               | Y   |                          |
| 4  | <i>sof467</i>  | 1-9           | Y                | Y                | Y            | Y               | Y   |                          |
| 5  | <i>sof447</i>  | 1-5           | Y                | Y                | Y            | Y               | Y   |                          |
| 6  | <i>sof445</i>  | 1-5           | Y                | Y                | Y            | Y               | Y   |                          |
| 7  | <i>sof448</i>  | 1-6           | Y                | Y                | Y            | Y               | Y   |                          |
| 8  | <i>sof10</i>   | 1-2           | Y                | Y                | Y            | Y               | Y   |                          |
| 9  | <i>sof100</i>  | 5-6           | Y                | Y                | Y            | Y               | Y   |                          |
| 10 | <i>sof220</i>  | 13-4          | Y                | Y                | Y            | Y               |     |                          |
| 11 | <i>sof258</i>  | 18-12         | Y                | Y                | Y            | Y               |     |                          |
| 12 | <i>sof641</i>  | 3-7           | Y                | Y                | Y            | Y               |     |                          |
| 13 | <i>sof655</i>  | 3-10          | Y                | Y                | Y            | Y               |     |                          |
| 14 | <i>sof694</i>  | 4-4           | Y                | Y                | Y            | Y               |     |                          |
| 15 | <i>sof609</i>  | 3-3           | Y                | Y                | Y            | Y               |     |                          |
| 16 | <i>sof259</i>  | 18-12         | Y                | Y                | Y            | Y               |     |                          |
| 17 | <i>sof637</i>  | 3-7           | Y                | Y                | Y            | Y               |     |                          |
| 18 | <i>sof707</i>  | 4-5           | Y                | Y                | Y            | Y               |     |                          |
| 19 | <i>sof714</i>  | 4-5           | Y                | Y                | Y            | Y               |     |                          |
| 20 | <i>sof715</i>  | 4-5           | Y                | Y                | Y            | Y               |     |                          |
| 21 | <i>sof732</i>  | 7-4           | Y                | Y                | Y            | Y               |     |                          |
| 22 | <i>sof748</i>  | 8-2           | Y                | Y                | Y            | Y               |     |                          |
| 23 | <i>sof751</i>  | 8-2           | Y                | Y                | Y            | Y               |     |                          |
| 24 | <i>sof753</i>  | 7-4           | Y                | Y                | Y            | Y               |     |                          |
| 25 | <i>sof756</i>  | 8-2           | Y                | Y                | Y            | Y               |     |                          |
| 26 | <i>sof759</i>  | 8-2           | Y                | Y                | Y            |                 |     |                          |
| 27 | <i>sof763</i>  | 8-2           | Y                | Y                | Y            |                 |     |                          |
| 28 | <i>sof808</i>  | 8-7           | Y                | Y                | Y            |                 |     |                          |
| 29 | <i>sof816</i>  | 8-7           | Y                | Y                | Y            |                 |     |                          |
| 30 | <i>sof817</i>  | 8-7           | Y                | Y                | Y            |                 |     |                          |
| 31 | <i>sof858</i>  | 8-9           | Y                | Y                | Y            |                 |     | Low germination          |
| 32 | <i>sof969</i>  | 8-7           | Y                | Y                | Y            |                 |     |                          |
| 33 | <i>sof975</i>  | 8-7           | Y                | Y                | Y            |                 |     |                          |
| 34 | <i>sof987</i>  | 5,6,7-2       | Y                | Y                | Y            |                 |     |                          |
| 35 | <i>sof990</i>  | 5,6,7-2       | Y                | Y                | Y            |                 |     |                          |
| 36 | <i>sof996</i>  | 5,6,7-4       | Y                | Y                | Y            |                 |     |                          |
| 37 | <i>sof997</i>  | 5,6,7-4       | Y                | Y                | Y            |                 |     | Dwarf, reduced fertility |
| 38 | <i>sof1003</i> | 5,6,7-3       | Y                | Y                | Y            |                 |     |                          |
| 39 | <i>sof1004</i> | 5,6,7-3       | Y                | Y                | Y            |                 |     |                          |
| 40 | <i>sof1011</i> | 5,6,7-3       | Y                | Y                | Y            |                 |     |                          |
| 41 | <i>sof1020</i> | 5,6-1         | Y                | Y                | Y            |                 |     |                          |
| 42 | <i>sof1053</i> | 5-10          | Y                | Y                | Y            |                 |     |                          |
| 43 | <i>sof1054</i> | 5-10          | Y                | Y                | Y            |                 |     |                          |
| 44 | <i>sof1056</i> | 5-10          | Y                | Y                | Y            |                 |     |                          |
| 45 | <i>sof1103</i> | 5,6,7-6       | Y                | Y                | Y            |                 |     |                          |
| 46 | <i>sof1154</i> | 5,6-5         | Y                | Y                | Y            |                 |     |                          |
| 47 | <i>sof1160</i> | 5,6,7-8       | Y                | Y                | Y            |                 |     |                          |
| 48 | <i>sof1174</i> | 5,6,7-9       | Y                | Y                | Y            |                 |     | Reduced fertility        |
| 49 | <i>sof1256</i> | 5,6,7-16      | Y                | Y                | Y            |                 |     |                          |
| 50 | <i>sof1266</i> | 5,6,7-19      | Y                | Y                | Y            |                 |     |                          |

|    |                |       |   |   |   |  |  |                                   |
|----|----------------|-------|---|---|---|--|--|-----------------------------------|
| 51 | <i>sof1553</i> | 10-0  | Y | Y | Y |  |  |                                   |
| 52 | <i>sof1580</i> | 12-5  | Y | Y | Y |  |  |                                   |
| 53 | <i>sof1598</i> | 7-6   | Y | Y | Y |  |  |                                   |
| 54 | <i>sof1603</i> | 7-6   | Y | Y | Y |  |  |                                   |
| 55 | <i>sof1604</i> | 7-6   | Y | Y | Y |  |  | Smaller leaves                    |
| 56 | <i>sof1605</i> | 7-6   | Y | Y | Y |  |  |                                   |
| 57 | <i>sof1606</i> | 7-6   | Y | Y | Y |  |  | Smaller leaves; >75%              |
| 58 | <i>sof1638</i> | 10-9  | Y | Y | Y |  |  | Smaller leaves; >90%              |
| 59 | <i>sof1646</i> | 11-1  | Y | Y | Y |  |  | 75% growth; others no germination |
| 60 | <i>sof1687</i> | 12-8  | Y | Y | Y |  |  | Smaller leaves; 75%               |
| 61 | <i>sof1707</i> | 13-3  | Y | Y | Y |  |  |                                   |
| 62 | <i>sof1710</i> | 13-3  | Y | Y | Y |  |  |                                   |
| 63 | <i>sof1745</i> | 14-1  | Y | Y | Y |  |  |                                   |
| 64 | <i>sof1761</i> | 11-4  | Y | Y | Y |  |  |                                   |
| 65 | <i>sof1770</i> | 11-6  | Y | Y | Y |  |  |                                   |
| 66 | <i>sof1777</i> | 11-8  | Y | Y | Y |  |  |                                   |
| 67 | <i>sof1780</i> | 11-8  | Y | Y | Y |  |  | Shorter petiole                   |
| 68 | <i>sof1809</i> | 11-13 | Y | Y | Y |  |  |                                   |
| 69 | <i>sof1822</i> | 15-3  | Y | Y | Y |  |  |                                   |
| 70 | <i>sof1876</i> | 16-4  | Y | Y | Y |  |  |                                   |
| 71 | <i>sof1881</i> | 16-4  | Y | Y | Y |  |  |                                   |
| 72 | <i>sof1913</i> | 16-15 | Y | Y | Y |  |  |                                   |
| 73 | <i>sof1916</i> | 16-16 | Y | Y | Y |  |  |                                   |
| 74 | <i>sof1931</i> | 16-20 | Y | Y | Y |  |  |                                   |
| 75 | <i>sof1937</i> | 18-1  | Y | Y | Y |  |  | Small plant at M2                 |
| 76 | <i>sof1944</i> | 18-3  | Y | Y | Y |  |  | Smaller leaves                    |
| 77 | <i>sof1946</i> | 18-3  | Y | Y | Y |  |  |                                   |
| 78 | <i>sof1953</i> | 19-13 | Y | Y | Y |  |  |                                   |
| 79 | <i>sof1960</i> | 18-4  | Y | Y | Y |  |  |                                   |
| 80 | <i>sof1963</i> | 18-4  | Y | Y | Y |  |  |                                   |
| 81 | <i>sof1966</i> | 18-4  | Y | Y | Y |  |  |                                   |
| 82 | <i>sof1977</i> | 18-6  | Y | Y | Y |  |  |                                   |
| 83 | <i>sof1946</i> | 18-3  | Y | Y | Y |  |  |                                   |
| 84 | <i>sof1953</i> | 19-13 | Y | Y | Y |  |  |                                   |

Table S2. Summary of RNAi-related *sof* mutants.

|    | Mutant ID     | SubFamily No. | DEX <sup>R</sup> | Hyg <sup>R</sup> | Western Blot | RNA Blot | NGS | Special Phenotype |
|----|---------------|---------------|------------------|------------------|--------------|----------|-----|-------------------|
| 1  | <i>sof18</i>  | 2-2           | Y                | Y                | Y            | ✓        | ✓   |                   |
| 2  | <i>sof30</i>  | 4-1           | Y                | Y                | Y            | ✓        | ✓   |                   |
| 3  | <i>sof47</i>  | 5-2           | Y                | Y                | Y            |          |     |                   |
| 4  | <i>sof51</i>  | 5-2           | Y                | Y                | Y            |          |     |                   |
| 5  | <i>sof56</i>  | 5-3           | Y                | Y                | Y            |          |     |                   |
| 6  | <i>sof133</i> | 6-1           | Y                | Y                | Y            |          |     |                   |
| 7  | <i>sof143</i> | 6-2           | Y                | Y                | Y            |          |     |                   |
| 8  | <i>sof231</i> | 14-6          | Y                | Y                | Y            |          |     |                   |
| 9  | <i>sof225</i> | 13-4          | Y                | Y                | Y            |          |     |                   |
| 10 | <i>sof244</i> | 16-17         | Y                | Y                | Y            |          |     |                   |
| 11 | <i>sof250</i> | 18-7          | Y                | Y                | Y            |          |     |                   |
| 12 | <i>sof255</i> | 18-18         | Y                | Y                | Y            |          |     |                   |
| 13 | <i>sof263</i> | 18-19         | Y                | Y                | Y            |          |     |                   |
| 14 | <i>sof305</i> | 1-0           | Y                | Y                | Y            |          |     |                   |
| 15 | <i>sof409</i> | 1-1           | Y                | Y                | Y            |          |     |                   |
| 16 | <i>sof412</i> | 1-2           | Y                | Y                | Y            |          |     |                   |
| 17 | <i>sof422</i> | 1-1           | Y                | Y                | Y            |          |     |                   |
| 18 | <i>sof423</i> | 1-3           | Y                | Y                | Y            |          |     |                   |
| 19 | <i>sof427</i> | 1-3           | Y                | Y                | Y            |          |     |                   |
| 20 | <i>sof436</i> | 1-3           | Y                | Y                | Y            |          |     |                   |
| 21 | <i>sof446</i> | 1-5           | Y                | Y                | Y            |          |     |                   |
| 22 | <i>sof449</i> | 1-6           | Y                | Y                | Y            |          |     |                   |
| 23 | <i>sof456</i> | 1-8           | Y                | Y                | Y            |          |     |                   |
| 24 | <i>sof459</i> | 1-8           | Y                | Y                | Y            |          |     |                   |
| 25 | <i>sof520</i> | 2-6           | Y                | Y                | Y            |          |     |                   |
| 26 | <i>sof521</i> | 2-6           | Y                | Y                | Y            |          |     |                   |
| 27 | <i>sof525</i> | 2-8           | Y                | Y                | Y            |          |     |                   |
| 28 | <i>sof526</i> | 2-8           | Y                | Y                | Y            |          |     |                   |
| 29 | <i>sof527</i> | 2-8           | Y                | Y                | Y            |          |     |                   |
| 30 | <i>sof529</i> | 2-9           | Y                | Y                | Y            |          |     |                   |
| 31 | <i>sof530</i> | 2-9           | Y                | Y                | Y            |          |     |                   |
| 32 | <i>sof532</i> | 2-11          | Y                | Y                | Y            |          |     |                   |
| 33 | <i>sof538</i> | 2-12          | Y                | Y                | Y            |          |     |                   |
| 34 | <i>sof611</i> | 3-3           | Y                | Y                | Y            |          |     |                   |
| 35 | <i>sof612</i> | 3-4           | Y                | Y                | Y            |          |     |                   |
| 36 | <i>sof615</i> | 3-4           | Y                | Y                | Y            |          |     |                   |
| 37 | <i>sof617</i> | 3-4           | Y                | Y                | Y            |          |     |                   |
| 38 | <i>sof618</i> | 3-4           | Y                | Y                | Y            |          |     |                   |
| 39 | <i>sof623</i> | 3-5           | Y                | Y                | Y            |          |     |                   |
| 40 | <i>sof626</i> | 3-6           | Y                | Y                | Y            |          |     |                   |
| 41 | <i>sof629</i> | 3-6           | Y                | Y                | Y            |          |     |                   |
| 42 | <i>sof631</i> | 3-6           | Y                | Y                | Y            |          |     |                   |
| 43 | <i>sof635</i> | 3-7           | Y                | Y                | Y            |          |     |                   |
| 44 | <i>sof640</i> | 3-7           | Y                | Y                | Y            |          |     |                   |
| 45 | <i>sof650</i> | 3-10          | Y                | Y                | Y            |          |     |                   |
| 46 | <i>sof683</i> | 4-2           | Y                | Y                | Y            |          |     |                   |
| 47 | <i>sof704</i> | 4-5           | Y                | Y                | Y            |          |     | Longer hypocotyl  |
| 48 | <i>sof705</i> | 4-5           | Y                | Y                | Y            |          |     | Longer hypocotyl  |
| 49 | <i>sof709</i> | 4-5           | Y                | Y                | Y            |          |     | Longer hypocotyl  |
| 50 | <i>sof711</i> | 4-5           | Y                | Y                | Y            |          |     | Longer hypocotyl  |

|     |                |          |   |   |   |  |  |                                         |
|-----|----------------|----------|---|---|---|--|--|-----------------------------------------|
| 51  | <i>sof713</i>  | 4-5      | Y | Y | Y |  |  | Longer hypocotyl                        |
| 52  | <i>sof725</i>  | 7-3      | Y | Y | Y |  |  |                                         |
| 53  | <i>sof747</i>  | 8-2      | Y | Y | Y |  |  |                                         |
| 54  | <i>sof767</i>  | 8-3      | Y | Y | Y |  |  |                                         |
| 55  | <i>sof769</i>  | 8-3      | Y | Y | Y |  |  |                                         |
| 56  | <i>sof779</i>  | 8-4      | Y | Y | Y |  |  |                                         |
| 57  | <i>sof780</i>  | 8-4      | Y | Y | Y |  |  |                                         |
| 58  | <i>sof784</i>  | 8-5      | Y | Y | Y |  |  |                                         |
| 59  | <i>sof800</i>  | 8-6      | Y | Y | Y |  |  |                                         |
| 60  | <i>sof821</i>  | 8-7      | Y | Y | Y |  |  |                                         |
| 61  | <i>sof822</i>  | 8-7      | Y | Y | Y |  |  |                                         |
| 62  | <i>sof829</i>  | 8-8      | Y | Y | Y |  |  |                                         |
| 63  | <i>sof847</i>  | 8-9      | Y | Y | Y |  |  |                                         |
| 64  | <i>sof864</i>  | 9-1      | Y | Y | Y |  |  | Longer hypocotyl,<br>enlarged cotyledon |
| 65  | <i>sof866</i>  | 9-1      | Y | Y | Y |  |  | Longer hypocotyl,<br>enlarged cotyledon |
| 66  | <i>sof876</i>  | 9-1      | Y | Y | Y |  |  |                                         |
| 67  | <i>sof992</i>  | 5,6,7-4  | Y | Y | Y |  |  | Weak rescue                             |
| 68  | <i>sof994</i>  | 5,6,7-4  | Y | Y | Y |  |  |                                         |
| 69  | <i>sof1016</i> | 5,6-1    | Y | Y | Y |  |  |                                         |
| 70  | <i>sof1024</i> | 5,6-1    | Y | Y | Y |  |  | Delayed siliques<br>opening             |
| 71  | <i>sof1039</i> | 9-9      | Y | Y | Y |  |  |                                         |
| 72  | <i>sof1040</i> | 9-9      | Y | Y | Y |  |  |                                         |
| 73  | <i>sof1060</i> | 5-10     | Y | Y | Y |  |  |                                         |
| 74  | <i>sof1106</i> | 5,6,7-6  | Y | Y | Y |  |  |                                         |
| 75  | <i>sof1127</i> | 5,6,7-13 | Y | Y | Y |  |  |                                         |
| 76  | <i>sof1152</i> | 5,6-5    | Y | Y | Y |  |  |                                         |
| 77  | <i>sof1219</i> | 5,6,7-18 | Y | Y | Y |  |  |                                         |
| 78  | <i>sof1221</i> | 5,6,7-18 | Y | Y | Y |  |  |                                         |
| 79  | <i>sof1230</i> | 5,6,7-22 | Y | Y | Y |  |  |                                         |
| 80  | <i>sof1232</i> | 5,6,7-22 | Y | Y | Y |  |  |                                         |
| 81  | <i>sof1257</i> | 5,6,7-16 | Y | Y | Y |  |  |                                         |
| 82  | <i>sof1259</i> | 5,6,7-19 | Y | Y | Y |  |  |                                         |
| 83  | <i>sof1255</i> | 5,6,7-16 | Y | Y | Y |  |  |                                         |
| 84  | <i>sof1260</i> | 5,6,7-19 | Y | Y | Y |  |  |                                         |
| 85  | <i>sof1273</i> | 5,6,7-21 | Y | Y | Y |  |  |                                         |
| 86  | <i>sof1274</i> | 5,6,7-21 | Y | Y | Y |  |  |                                         |
| 87  | <i>sof1278</i> | 5,6,7-21 | Y | Y | Y |  |  |                                         |
| 88  | <i>sof1279</i> | 5,6,7-21 | Y | Y | Y |  |  |                                         |
| 89  | <i>sof1285</i> | 5,6,7-24 | Y | Y | Y |  |  |                                         |
| 90  | <i>sof1286</i> | 5,6,7-24 | Y | Y | Y |  |  |                                         |
| 91  | <i>sof1288</i> | 5,6,7-24 | Y | Y | Y |  |  |                                         |
| 92  | <i>sof1416</i> | 10-2     | Y | Y | Y |  |  |                                         |
| 93  | <i>sof1426</i> | 10-6     | Y | Y | Y |  |  |                                         |
| 94  | <i>sof1501</i> | 2-0      | Y | Y | Y |  |  |                                         |
| 95  | <i>sof1506</i> | 2-0      | Y | Y | Y |  |  |                                         |
| 96  | <i>sof1545</i> | 9-0      | Y | Y | Y |  |  | Longer hypocotyl,<br>shorter root       |
| 97  | <i>sof1550</i> | 10-0     | Y | Y | Y |  |  |                                         |
| 98  | <i>sof1551</i> | 10-0     | Y | Y | Y |  |  |                                         |
| 99  | <i>sof1554</i> | 10-0     | Y | Y | Y |  |  |                                         |
| 100 | <i>sof1607</i> | 5,6,7-21 | Y | Y | Y |  |  | Shorter petiole                         |

|     |                |       |   |   |   |  |                                        |
|-----|----------------|-------|---|---|---|--|----------------------------------------|
| 101 | <i>sof1608</i> | 7-6   | Y | Y | Y |  |                                        |
| 102 | <i>sof1620</i> | 7-6   | Y | Y | Y |  |                                        |
| 103 | <i>sof1623</i> | 10-7  | Y | Y | Y |  |                                        |
| 104 | <i>sof1624</i> | 10-7  | Y | Y | Y |  |                                        |
| 105 | <i>sof1625</i> | 10-7  | Y | Y | Y |  |                                        |
| 106 | <i>sof1626</i> | 10-7  | Y | Y | Y |  |                                        |
| 107 | <i>sof1628</i> | 10-7  | Y | Y | Y |  |                                        |
| 108 | <i>sof1633</i> | 10-8  | Y | Y | Y |  |                                        |
| 109 | <i>sof1656</i> | 10-8  | Y | Y | Y |  |                                        |
| 110 | <i>sof1656</i> | 11-3  | Y | Y | Y |  | Large plant at M2                      |
| 111 | <i>sof1657</i> | 11-3  | Y | Y | Y |  |                                        |
| 112 | <i>sof1661</i> | 11-3  | Y | Y | Y |  |                                        |
| 113 | <i>sof1671</i> | 11-3  | Y | Y | Y |  |                                        |
| 114 | <i>sof1680</i> | 12-6  | Y | Y | Y |  |                                        |
| 115 | <i>sof1691</i> | 12-7  | Y | Y | Y |  |                                        |
| 116 | <i>sof1680</i> | 12-7  | Y | Y | Y |  |                                        |
| 117 | <i>sof1691</i> | 13-1  | Y | Y | Y |  |                                        |
| 118 | <i>sof1704</i> | 13-3  | Y | Y | Y |  | Smaller cotyledon leaves               |
| 119 | <i>sof1705</i> | 13-3  | Y | Y | Y |  | Smaller cotyledon leaves               |
| 120 | <i>sof1706</i> | 13-3  | Y | Y | Y |  |                                        |
| 121 | <i>sof1719</i> | 13-7  | Y | Y | Y |  | Smaller cotyledon leaves               |
| 122 | <i>sof1720</i> | 13-7  | Y | Y | Y |  | Enlarged cotyledon leaves              |
| 123 | <i>sof1725</i> | 13-7  | Y | Y | Y |  | Smaller cotyledon leaves               |
| 124 | <i>sof1726</i> | 13-7  | Y | Y | Y |  | Some no germination                    |
| 125 | <i>sof1727</i> | 13-7  | Y | Y | Y |  | Extremely smaller cotyledon leaves     |
| 126 | <i>sof1742</i> | 13-11 | Y | Y | Y |  |                                        |
| 127 | <i>sof1749</i> | 14-2  | Y | Y | Y |  | Some no germination                    |
| 128 | <i>sof1760</i> | 14-7  | Y | Y | Y |  |                                        |
| 129 | <i>sof1762</i> | 11-4  | Y | Y | Y |  | Large plant at M2, some no germination |
| 130 | <i>sof1778</i> | 11-8  | Y | Y | Y |  |                                        |
| 131 | <i>sof1789</i> | 11-10 | Y | Y | Y |  |                                        |
| 132 | <i>sof1794</i> | 11-11 | Y | Y | Y |  |                                        |
| 133 | <i>sof1796</i> | 11-12 | Y | Y | Y |  |                                        |
| 134 | <i>sof1799</i> | 11-12 | Y | Y | Y |  |                                        |
| 135 | <i>sof1816</i> | 15-2  | Y | Y | Y |  |                                        |
| 136 | <i>sof1820</i> | 15-2  | Y | Y | Y |  | Curved leaves at M2                    |
| 137 | <i>sof1825</i> | 15-5  | Y | Y | Y |  |                                        |
| 138 | <i>sof1899</i> | 16-10 | Y | Y | Y |  |                                        |
| 139 | <i>sof1903</i> | 16-12 | Y | Y | Y |  |                                        |
| 140 | <i>sof1927</i> | 16-19 | Y | Y | Y |  |                                        |
| 141 | <i>sof1936</i> | 18-1  | Y | Y | Y |  |                                        |
| 142 | <i>sof1939</i> | 18-1  | Y | Y | Y |  |                                        |
| 143 | <i>sof1967</i> | 18-4  | Y | Y | Y |  | Yellow seeds                           |
| 144 | <i>sof1968</i> | 18-4  | Y | Y | Y |  | Yellow seeds                           |
| 145 | <i>sof1979</i> | 18-9  | Y | Y | Y |  |                                        |

Table S3. Backcross genetic analysis of putative *sof* mutants for single recessive mutation.

| <b>Mutant line</b> |  | <b>Genotype</b> |  |
|--------------------|--|-----------------|--|
| <i>sof</i> mutant  |  | <b>mmRR</b>     |  |
| Free1-RNAi         |  | <b>MMRR</b>     |  |

**P**     *sof* mutant (mmRR)     X     Free1-RNAi (MMRR)

**F1**     MmRR

**F1 selfbreeding F2**

|           | <b>MR</b> | <b>mR</b> |
|-----------|-----------|-----------|
| <b>MR</b> | MMRR      | MmRR      |
| <b>mR</b> | MmRR      | mmRR      |

**MS+DEX**  
**1/4 Survived**  
**For single gene recessive mutation**

|           | <b>MR</b> | <b>mR</b> |
|-----------|-----------|-----------|
| <b>MR</b> | MMRR      | MmRR      |
| <b>mR</b> | MmRR      | mmRR      |

For both FREE1-related and RNAi-related *sof* mutants, backcross with FREE1-RNAi line was used to detect whether the mutation was a single recessive mutation. Single recessive mutation should show 1/4 survival ration on plates with MS+DEX.

Table S4. Genetic analysis of putative single recessive *sof* mutations for outcross mapping population.

| <b>Mutant line</b> |  | <b>Genotype</b> |  |
|--------------------|--|-----------------|--|
| Ler                |  | <b>MMrr</b>     |  |
| <i>sof</i> mutant  |  | <b>mmRR</b>     |  |
| Free1-RNAi         |  | <b>MMRR</b>     |  |

**P**     *sof* mutant (mmRR)     X     Ler (MMrr)

**F1**     MmRr

**F1 selfbreeding F2**

|           | <b>MR</b> | <b>Mr</b> | <b>mR</b> | <b>mr</b> |
|-----------|-----------|-----------|-----------|-----------|
| <b>MR</b> | MMRR      | MMRr      | MmRR      | MmRr      |
| <b>Mr</b> | MMRr      | MMrr      | MmRr      | Mmrr      |
| <b>mR</b> | MmRR      | MmRr      | mmRR      | mmRr      |
| <b>mr</b> | MmRr      | Mmrr      | mmRr      | mmrr      |

**MS+DEX+Hyg 3/16 Survived**  
**For single gene recessive mutation**

|           | <b>MR</b> | <b>Mr</b> | <b>mR</b> | <b>mr</b> |
|-----------|-----------|-----------|-----------|-----------|
| <b>MR</b> | MMRR      | MMRr      | MmRR      | MmRr      |
| <b>Mr</b> | MMRr      | MMrr      | MmRr      | Mmrr      |
| <b>mR</b> | MmRR      | MmRr      | mmRR      | mmRr      |
| <b>mr</b> | MmRr      | Mmrr      | mmRr      | mmrr      |

For both FREE1-related and RNAi-related *sof* mutants, outcross with Ler was used to establish the mapping population. Single recessive mutation should show 3/16 survival ration on plates with MS+DEX+Hyg.

Table S5. Genetic analysis of FREE1-related single recessive *sof* mutations cross with *free1-1* knock-out mutant.

| Mutant line                 | Genotype |            |
|-----------------------------|----------|------------|
| <i>free1-1</i> (-/-, T-DNA) | MMrrff   | HygR, DexR |
| <i>sof</i> mutant           | mmRRFF   | HygR, DexR |
| Free1-RNAi                  | MMRRFF   | HygR, DexS |

  

|    |                                                       |   |                               |
|----|-------------------------------------------------------|---|-------------------------------|
| P  | <i>sof</i> mutant (mmRRFF)                            | X | <i>free1-1</i> (+/-) (MMrrFf) |
| F1 | <b>MmRrFf<sup>HygR</sup></b> (Selected by genotyping) |   |                               |

  

| F1 MmRrFf selfbreeding F2 |        |        |        |        |        |        |        |        |
|---------------------------|--------|--------|--------|--------|--------|--------|--------|--------|
|                           | MRF    |
| <b>MRF</b>                | MMRRFF |
| <b>MRf</b>                | MMRRFf |
| <b>MrF</b>                | MMRrFF |
| <b>Mrf</b>                | MMRrFf |
| <b>mRF</b>                | MmRRFF |
| <b>mRf</b>                | MmRRFf |
| <b>mrF</b>                | MmRrFF |
| <b>mrf</b>                | MmRrFf |

  

| MS+DEX+Hyg                                    |        |        |                |                |         |               |                |                |
|-----------------------------------------------|--------|--------|----------------|----------------|---------|---------------|----------------|----------------|
| 21/64 survived for FREE1-related <i>sof</i>   |        |        |                |                |         |               |                |                |
| OR 14/64 survived for RNAi-related <i>sof</i> |        |        |                |                |         |               |                |                |
|                                               | MRF    | MRf    | MrF            | Mrf            | mRF     | mRf           | mrF            | mrf            |
| <b>MRF</b>                                    | MMRRFF | MMRRFf | MMRrFF         | MMRrFf         | MmRRFF  | MmRRFf        | MmRrFF         | MmRrFf         |
| <b>MRf</b>                                    | MMRRFf | MMRRff | MMRrFf         | MMRrff         | MmRRFf  | MmRRff        | MmRrFf         | MmRrff         |
| <b>MrF</b>                                    | MMRrFF | MMRrFf | MMrrFF         | <u>^MMrrFf</u> | MmRrFF  | MmRrFf        | MmrrFF         | <u>^MmrrFf</u> |
| <b>Mrf</b>                                    | MMRrFf | MMRrff | <u>^MMrrFf</u> | MMrrff         | MmRrFf  | MmRrff        | <u>^MmrrFf</u> | Mmrrff         |
| <b>mRF</b>                                    | MmRRFF | MmRRFf | MmRrFF         | MmRrFf         | #mmRRFF | #mmRRFf       | #mmRrFF        | #mmRrFf        |
| <b>mRf</b>                                    | MmRRFf | MmRRff | MmRrFf         | MmRrff         | #mmRRFf | <b>mmRRff</b> | #mmRrFf        | <b>mmRrff</b>  |
| <b>mrF</b>                                    | MmRrFF | MmRrFf | MmrrFF         | <u>^MmrrFf</u> | #mmRrFF | #mmRrFf       | <b>mmrrFF</b>  | <u>^mmrrFf</u> |
| <b>mrf</b>                                    | MmRrFf | MmRrff | <u>^MmrrFf</u> | Mmrrff         | #mmRrFf | <b>mmRrff</b> | <u>^mmrrFf</u> | <b>mmrrff</b>  |

For FREE1-related *sof* mutants, cross with *free1-1* T-DNA knockout line was used to verify that the *sof* mutation was able to suppress the lethal phenotype of *free1-1*. FREE1-related *sof* mutants crossed with *free1-1* heterozygous plants makes F1, and *free1* heterozygous F1 were selected by genotyping for F2. Real FREE1 suppressor should show 21/64 survival ration on plates with MS+DEX+Hyg, of which 4(Underlined and shading in green) harbor *sof* mutation in *free1-1* homozygous plant survived, ^represents the survived genotypes (8/64) showing same phenotype like *free1-1* heterozygous mutant on MS+DEX+Hyg, #represents the survived genotypes (9/64) showing same phenotype like corresponding *sof* mutant on MS+DEX+Hyg.
